# Supplementary material for: Association of Clinical Outcomes With Left Ventricular Assist Device Use by Bridge to Transplant or Destination Therapy Intent: The Multicenter Study of MagLev Technology in Patients Undergoing Mechanical Circulatory Support Therapy With HeartMate 3 (MOMENTUM 3) Randomized Clinical Trial
Source: PubMed Central journal article supplement — JAMA Cardiol. 2020 Jan 15;5(4):411–9. doi: 10.1001/jamacardio.2019.5323 (PMC6990746; doi:10.1001/jamacardio.2019.5323), 2020-01-15
Supplement: jamacardiol-5-411-s001.pdf [file jamacardiol-5-411-s001.pdf]

## Supplementary Online Content

Goldstein DJ, Naka Y, Horstmanshof D, et al. Association of clinical outcomes with left ventricular assist device use by bridge to transplant or destination therapy intent: the Multicenter Study of MagLev Technology in Patients Undergoing Mechanical Circulatory Support Therapy With HeartMate 3 (MOMENTUM 3) randomized clinical trial. *JAMA Cardiol*. Published online January 15, 2020. doi:10.1001/jamacardio.2019.5323

**eFigure 1.** CONSORT diagram

**eFigure 2.** Overall survival for patients receiving the HeartMate 3 and HeartMate II, stratified by intended use

**eFigure 3.** Freedom from pump thrombosis in BTT/BTC and DT patients

**eFigure 4.** Freedom from any stroke in BTT/BTC and DT patients

**eFigure 5.** Freedom from gastrointestinal bleeding in BTT/BTC and DT patients

**eFigure 6.** Comparison of non-hemocompatibility related adverse events in BTT/BTC and DT patients

**eFigure 7.** Functional status and quality of life for BTT/BTC and DT patients implanted with HeartMate 3

**eFigure 8.** Functional Status and quality of life for BTT/BTC and DT patients implanted with HeartMate II

**eTable 1.** Components of the primary endpoint

**eTable 2.** Cox proportional hazards model for the primary endpoint

**eTable 3.** Days out of the hospital and rehospitalizations

This supplementary material has been provided by the authors to give readers additional information about their work.

## SUPPLEMENTARY FIGURES

eFigure 1. CONSORT diagram

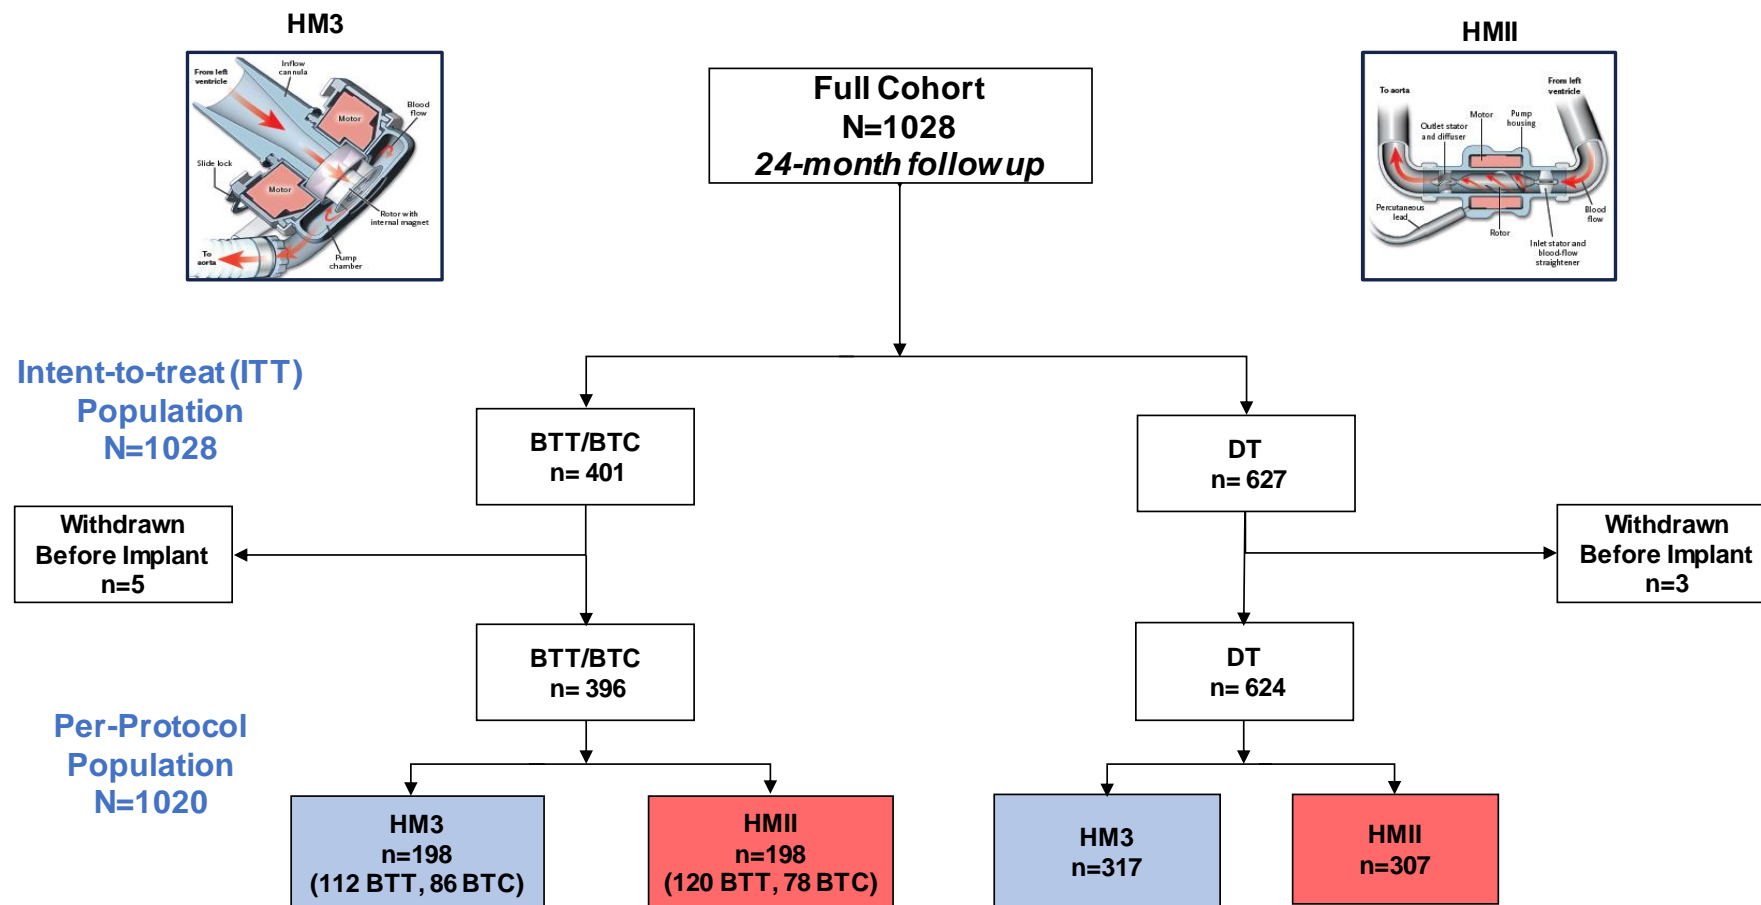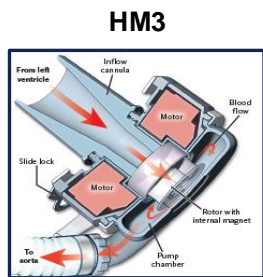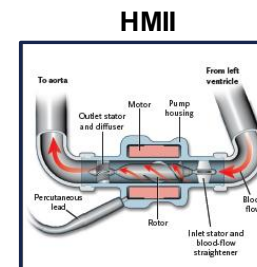

The CONSORT diagram shows the number of randomized patients (intent-to-treat population) and patients that underwent implant with HeartMate 3 or HeartMate II (per-protocol population) stratified by their intended goal of therapy. Eight patients were excluded from the per-protocol analysis due to death prior to implant (n=3), withdrawal of consent (n=1), transplantation (n=1), no LVAD implant (n=2) or implantation with a non-study LVAD (n=1). BTC, bridge to candidacy; BTT, bridge to transplantation; DT, destination therapy; HeartMate 3, HM3; HeartMate II, HMII.

**eFigure 2. Overall survival for patients receiving the HeartMate 3 and HeartMate II, stratified by intended use**

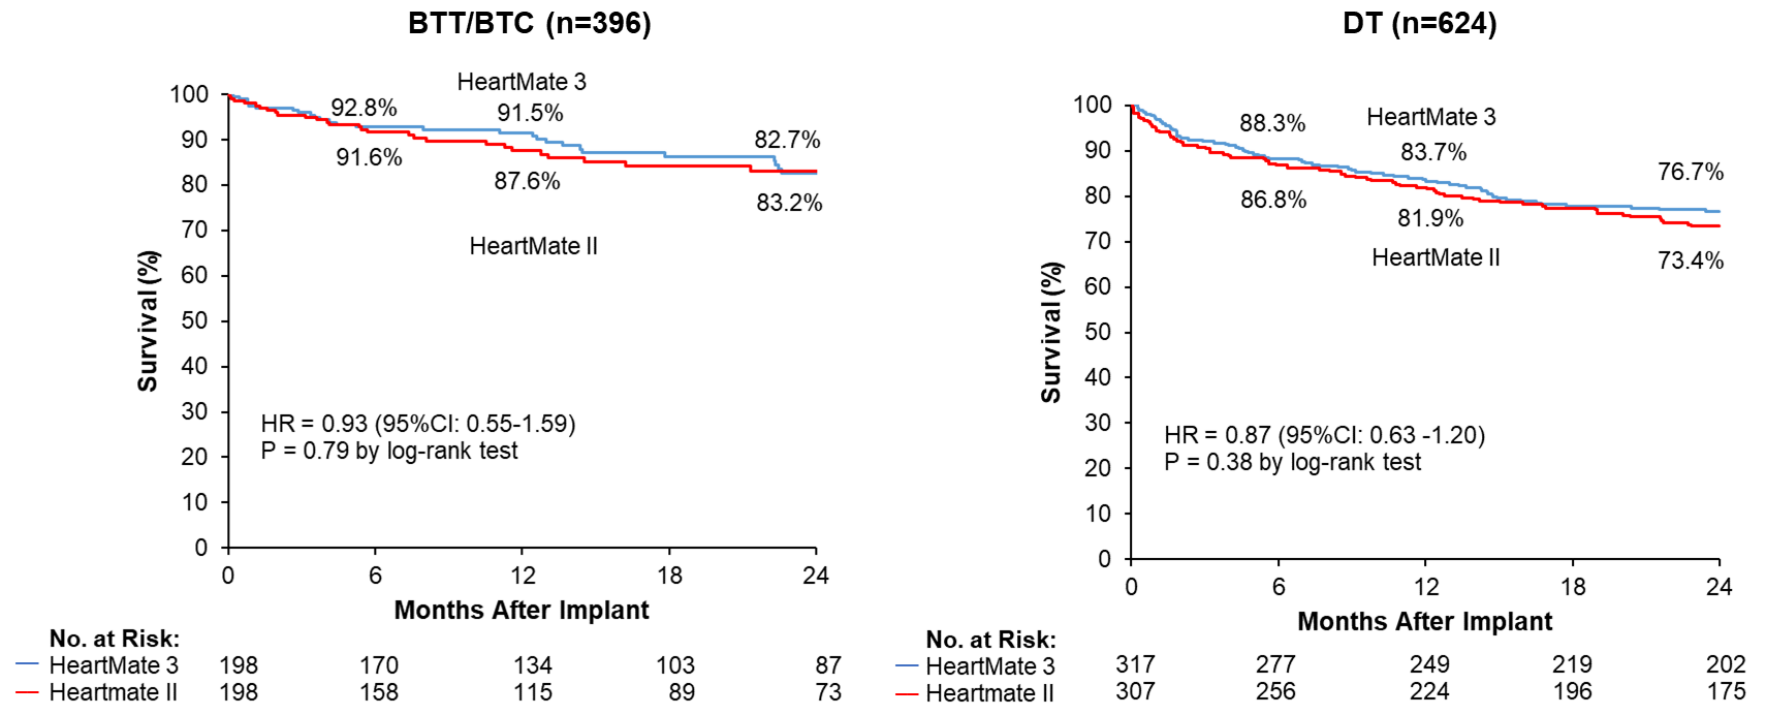

BTC, bridge to candidacy; BTT, bridge to transplantation; DT, destination therapy; HeartMate 3, HM3; HeartMate II, HMII.

**eFigure 3. Freedom from pump thrombosis in BTT/BTC and DT patients**

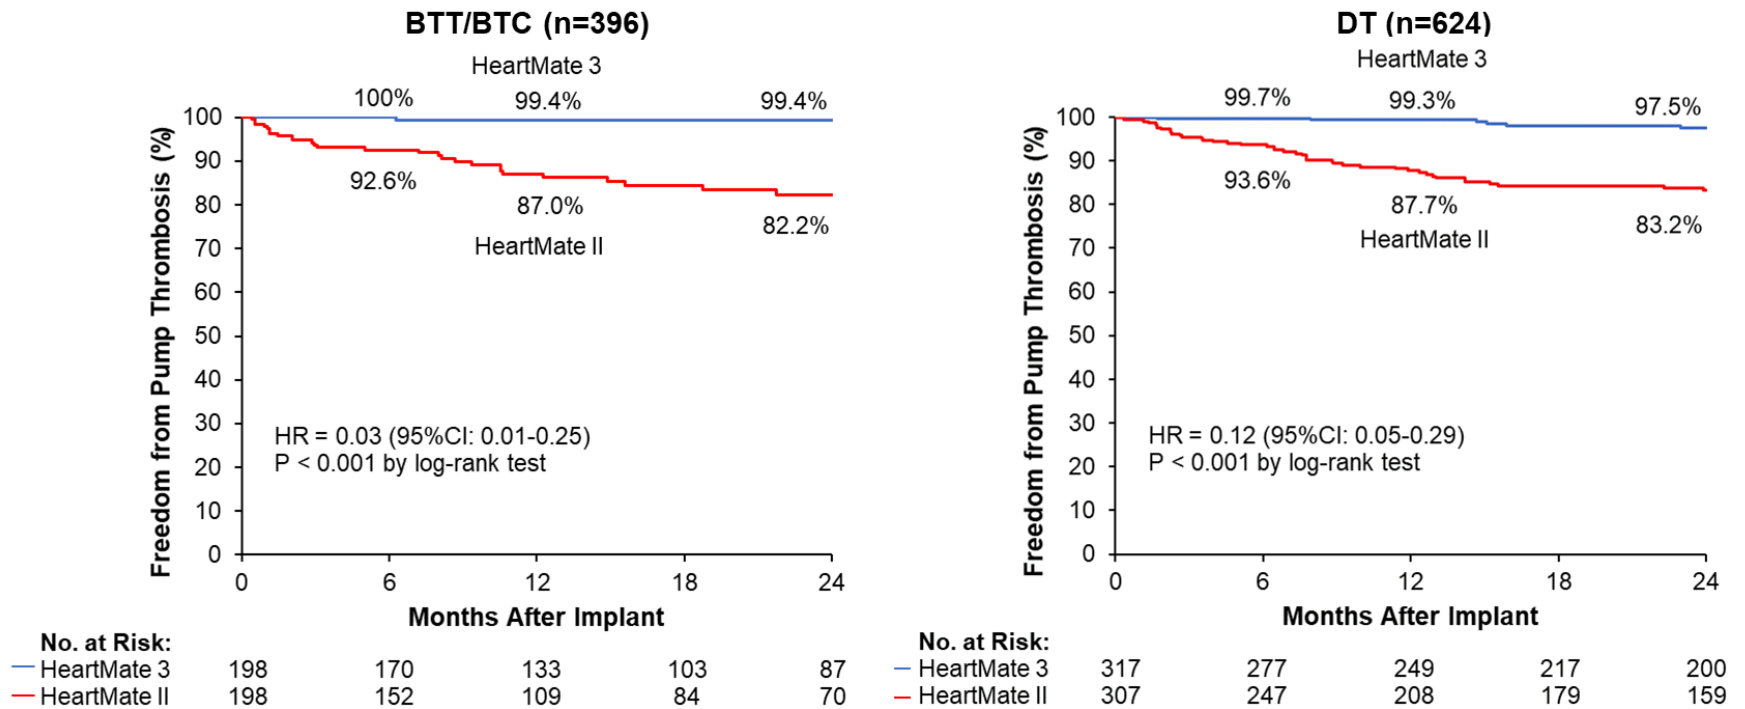

BTC, bridge to candidacy; BTT, bridge to transplantation; DT, destination therapy; HeartMate 3, HM3; HeartMate II, HMII.

**eFigure 4. Freedom from any stroke in BTT/BTC and DT patients**

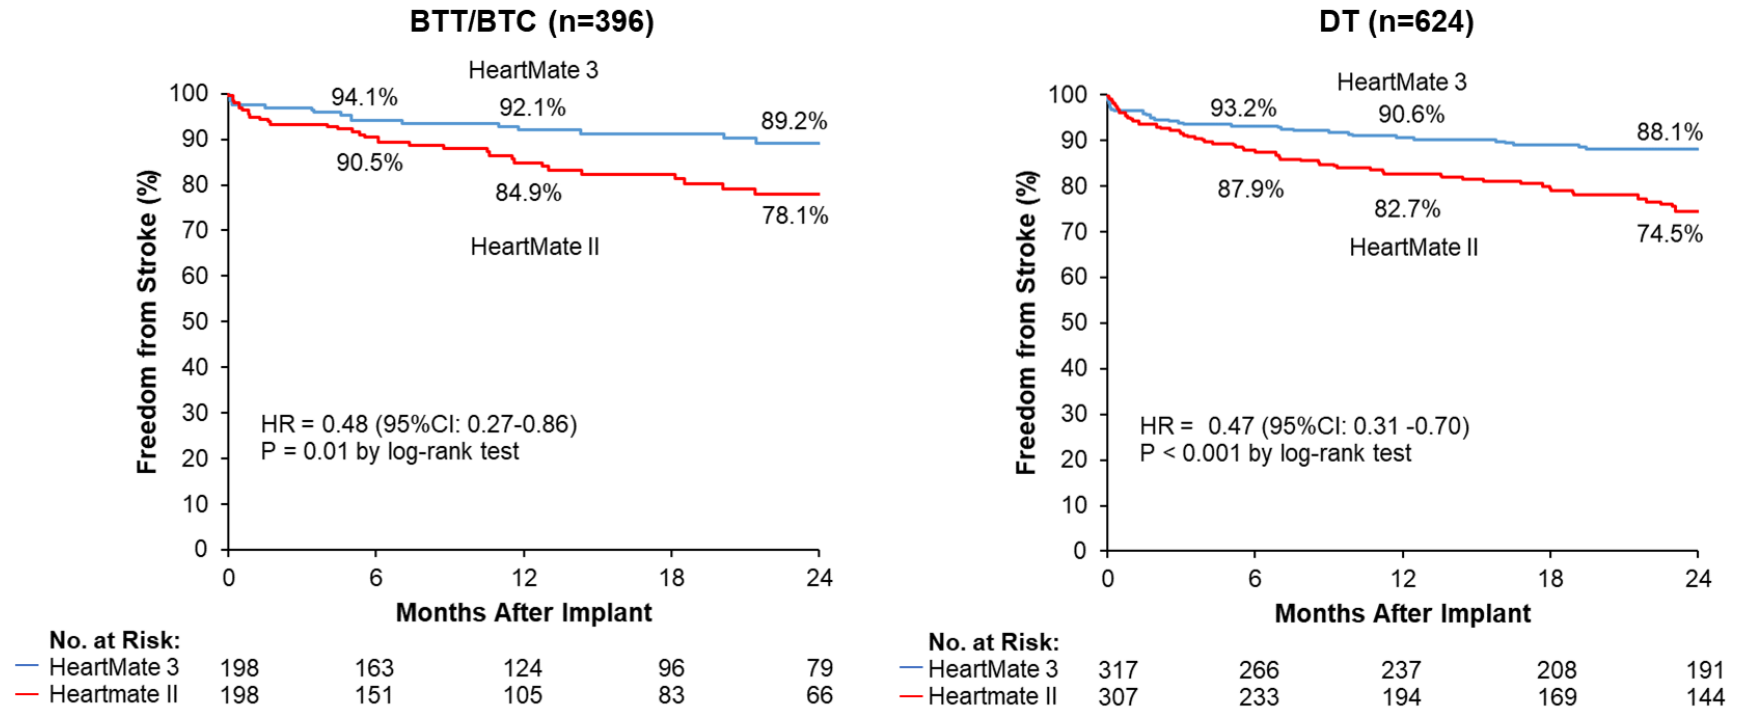

BTC, bridge to candidacy; BTT, bridge to transplantation; DT, destination therapy; HeartMate 3, HM3; HeartMate II, HMII.

**eFigure 5. Freedom from gastrointestinal bleeding in BTT/BTC and DT patients**

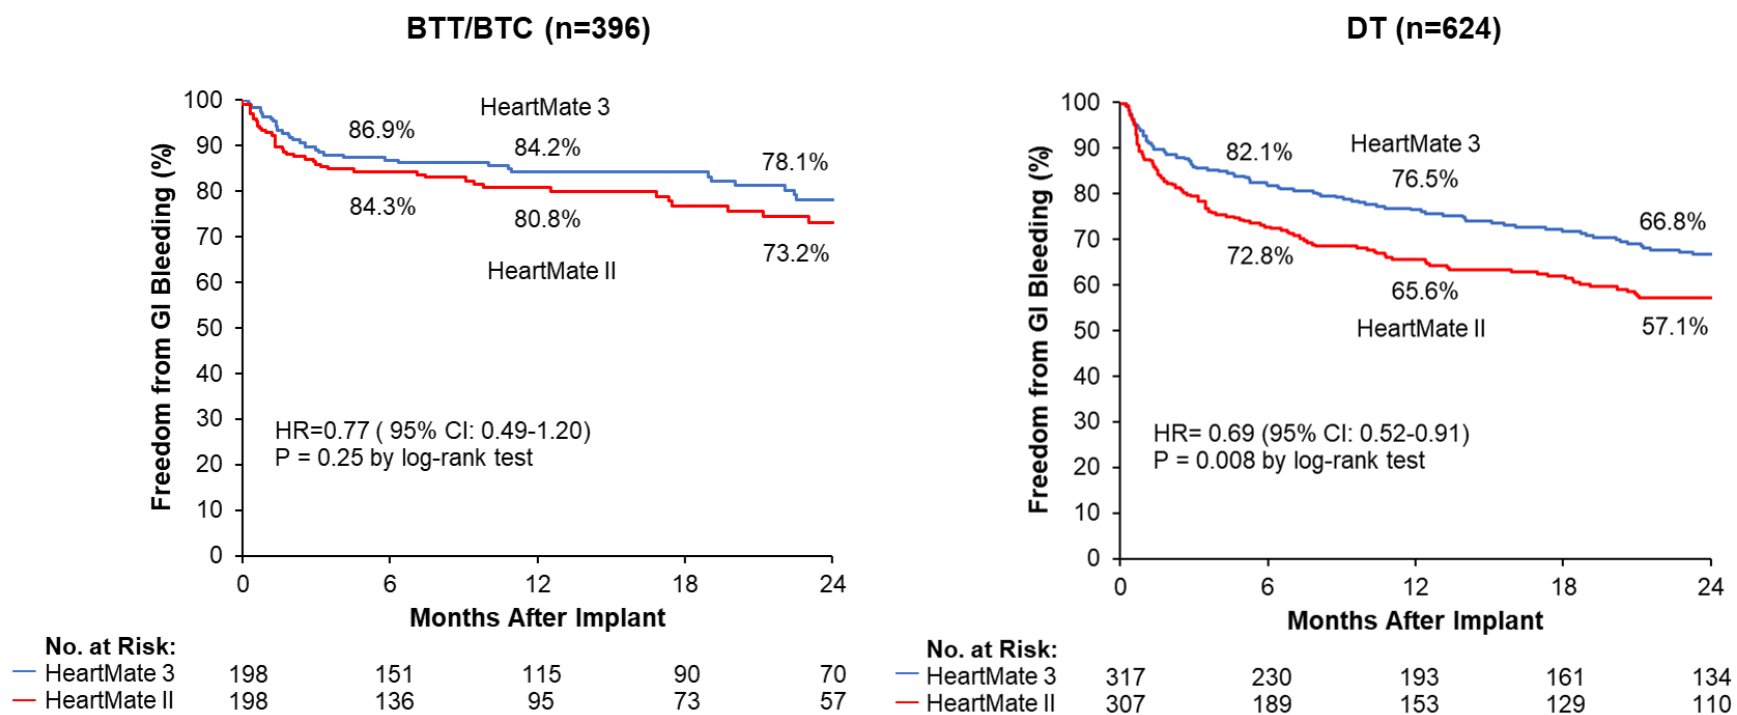

BTC, bridge to candidacy; BTT, bridge to transplantation; DT, destination therapy; HeartMate 3, HM3; HeartMate II, HMII.

**eFigure 6. Comparison of non-hemocompatibility related adverse events in BTT/BTC and DT patients**

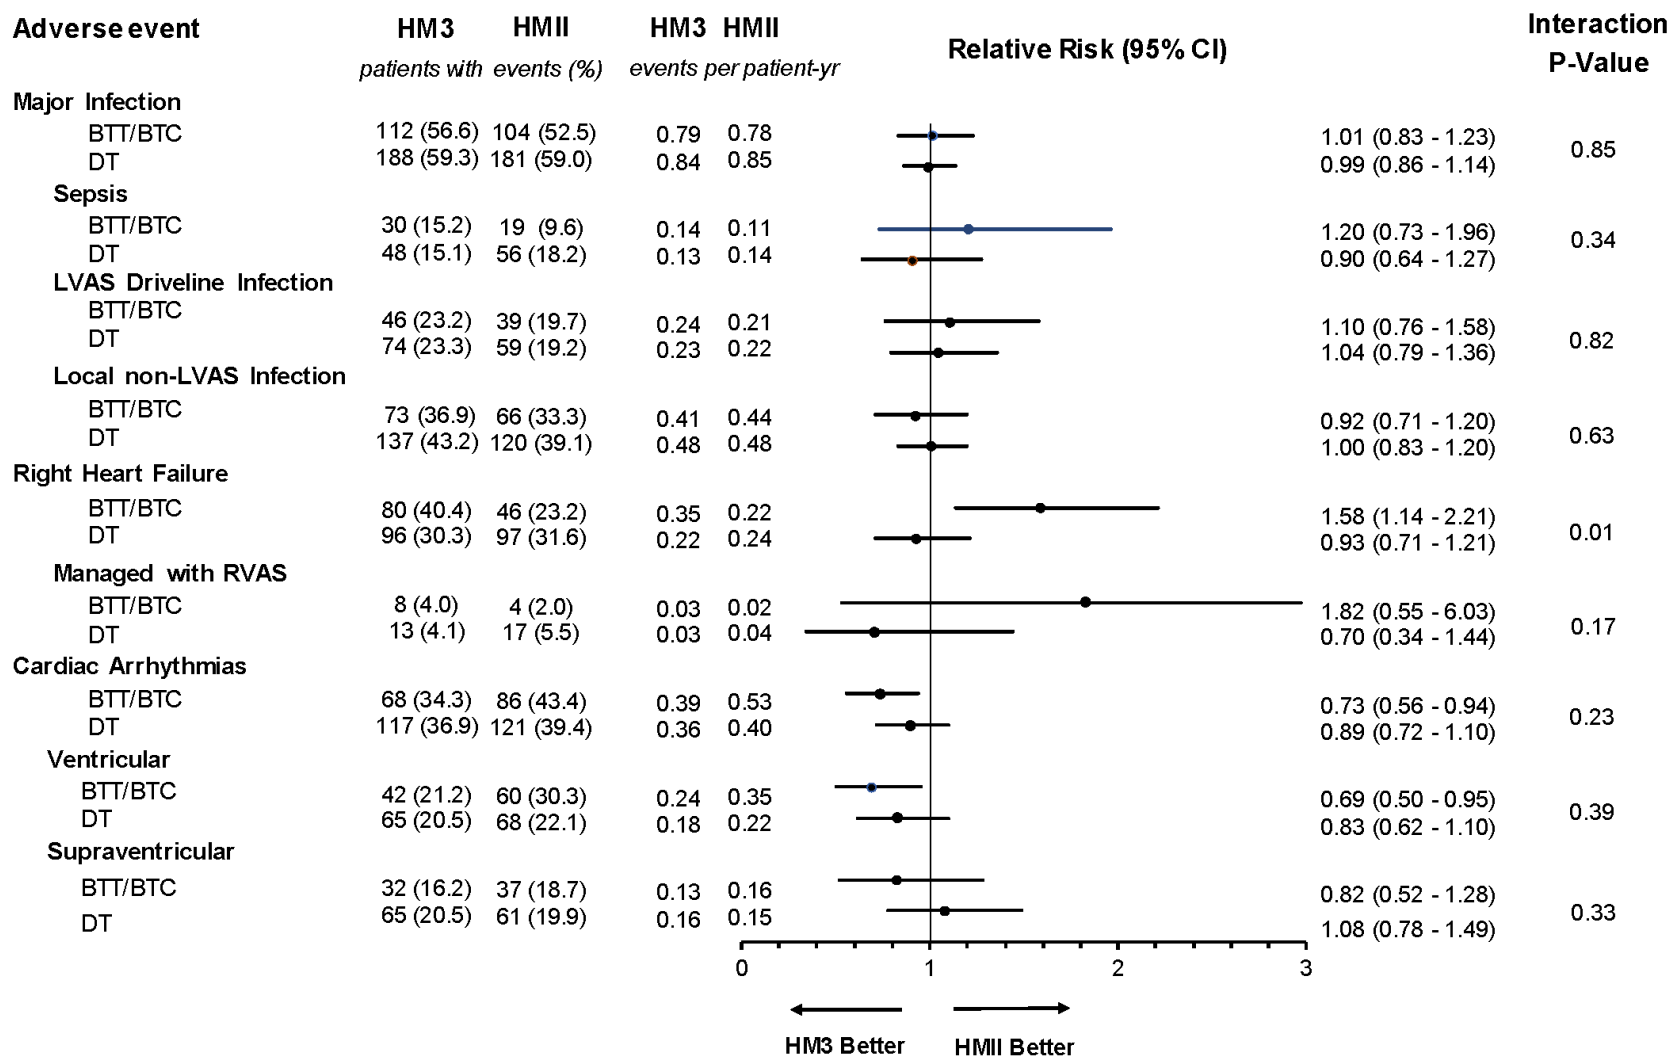

BTC, bridge to candidacy; BTT, bridge to transplantation; CI, confidence interval; DT, destination therapy; HeartMate 3, HM3; HeartMate II, HMII; RVAS, right ventricular assist system

**eFigure 7. Functional status and quality of life for BTT/BTC and DT patients implanted with HeartMate 3**

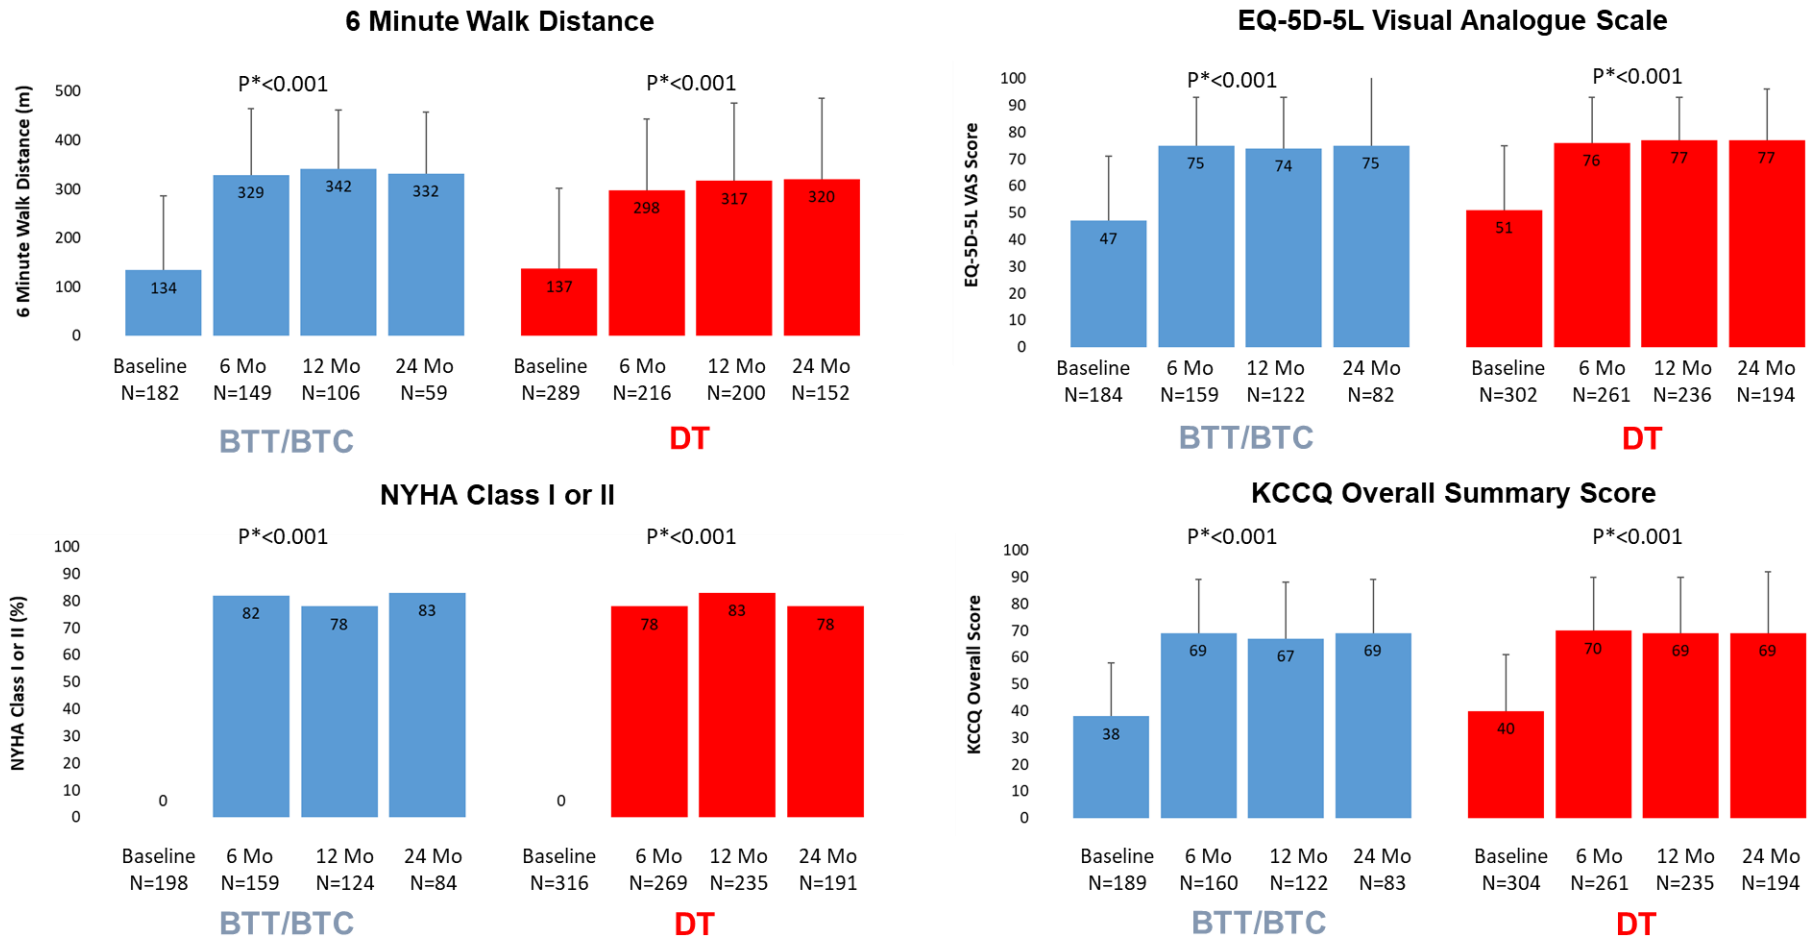

\* p-values for treatment over time. Longitudinal changes were analyzed with linear mixed-effects modeling using data from baseline, 3, 6, 18 and 24 month visits. HeartMate 3 vs. HeartMate II from mixed modeling over all time points were not significant for any assessment.



**eFigure 8. Functional Status and quality of life for BTT/BTC and DT patients implanted with HeartMate II**

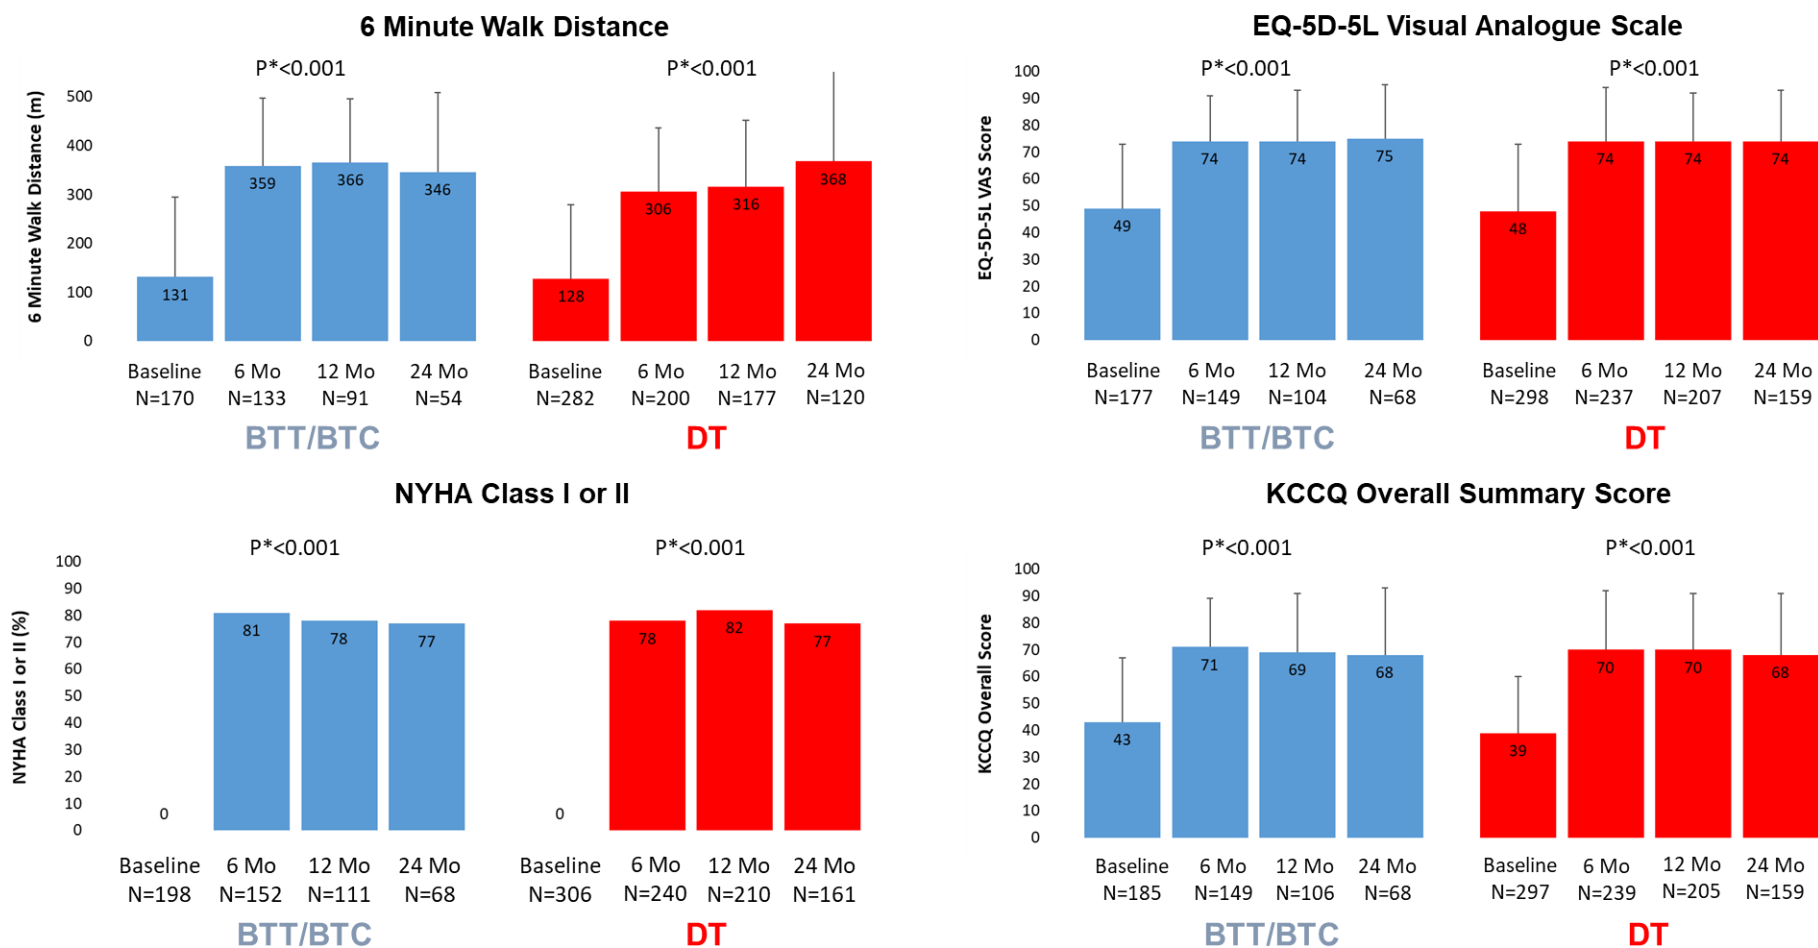

\* p-values for treatment over time. Longitudinal changes were analyzed with linear mixed-effects modeling using data from baseline, 3, 6, 18 and 24 month visits. Comparisons of HeartMate 3 vs. HeartMate II from mixed modeling over all time points were not significant for any assessment.

## SUPPLEMENTARY TABLES

**eTable 1. Components of the primary endpoint**

|                                                    | <b>HeartMate 3<br/>BTT/BTC<br/>(n=198)</b> | <b>HeartMate II<br/>BTT/BTC<br/>(n=198)</b> | <b>HeartMate 3<br/>DT<br/>(n=317)</b> | <b>HeartMate II<br/>DT<br/>(n=307)</b> |
|----------------------------------------------------|--------------------------------------------|---------------------------------------------|---------------------------------------|----------------------------------------|
| Patients failing the primary endpoint <sup>a</sup> | 36 (18.2%)                                 | 53 (26.8%)                                  | 82 (25.9%)                            | 120 (39.1%)                            |
| Withdrawal post-implant                            | 1 (0.5%)                                   | 0 (0%)                                      | 3 (0.9%)                              | 3 (1.0%)                               |
| Reoperation <sup>b</sup>                           | 6 (3.0%)                                   | 29 (14.6%)                                  | 8 (2.5%)                              | 44 (14.3%)                             |
| Disabling stroke                                   | 7 (3.5%)                                   | 10 (5.1%)                                   | 13 (4.1%)                             | 20 (6.5%)                              |
| Death                                              | 22 (11.1%)                                 | 14 (7.1%)                                   | 58 (18.3%)                            | 53 (17.3%)                             |

BTC, bridge to candidacy; BTT, bridge to transplantation; DT, destination therapy.

<sup>a</sup> The event that occurred first was noted as the failure event.

<sup>b</sup> Includes pump replacement, urgent heart transplantation for device malfunction, or explantation or permanent deactivation of the device for a reason other than myocardial recovery.

**eTable 2. Cox proportional hazards model for the primary endpoint**

| <b>Final Model Parameters</b>                        | <b>Hazard Ratio</b> | <b>95% Confidence Interval</b> | <b>P-value</b> |
|------------------------------------------------------|---------------------|--------------------------------|----------------|
| HeartMate 3 vs. HeartMate II                         | 0.644               | (0.509 - 0.815)                | <0.001         |
| eGFR (per increase of 1 ml/min/1.73 m <sup>2</sup> ) | 0.992               | (0.986 - 0.998)                | 0.01           |
| Non-Caucasian vs. Caucasian                          | 0.726               | (0.546 - 0.966)                | 0.03           |
| BTT/BTC vs. DT                                       | 0.833               | (0.639 - 1.085)                | 0.18           |
| Ischemic vs. non-ischemic etiology                   | 1.378               | (0.994 - 1.912)                | 0.05           |
| PCWP (per increase of 1 mmHg)                        | 0.989               | (0.976 – 1.002)                | 0.10           |
| Age (per increase of 1 year)                         | 0.997               | (0.985 – 1.009)                | 0.62           |
| Prior cardiac surgery vs. no prior cardiac surgery   | 0.928               | (0.665 – 1.294)                | 0.66           |

BTC, bridge to candidacy; BTT, bridge to transplantation; DT, destination therapy; eGFR, estimated glomerular filtration rate; PCWP, pulmonary capillary wedge pressure.

**eTable 3. Days out of the hospital and rehospitalizations**

| <b>Patients discharged from implant hospitalization on LVAD support</b>                    | <b>HeartMate 3</b> | <b>HeartMate II</b> | <b>Difference or HR (95%CI)</b> | <b>P</b>           |
|--------------------------------------------------------------------------------------------|--------------------|---------------------|---------------------------------|--------------------|
| <b>BTT/BTC</b>                                                                             | n=191              | n=188               |                                 |                    |
| Median duration of rehospitalization<br>[interquartile range] – days                       | 12<br>[3-32]       | 14<br>[3-32]        | - 2                             | 0.90 <sup>a</sup>  |
| Median duration on LVAD support <i>outside</i> of hospital<br>[interquartile range] – days | 507<br>[263-685]   | 450<br>[206-678]    | + 57                            | 0.23 <sup>a</sup>  |
| Rate of rehospitalization for any cause – EPPY                                             | 2.52               | 2.53                | 1.01 (0.91-1.14)                | 0.83 <sup>b</sup>  |
| <b>DT</b>                                                                                  | n=294              | n=283               |                                 |                    |
| Median duration of rehospitalization<br>[interquartile range] – days                       | 15<br>[4-43]       | 22<br>[7-49]        | - 7                             | 0.005 <sup>a</sup> |
| Median duration on LVAD support <i>outside</i> of hospital<br>[interquartile range] – days | 668<br>[438-700]   | 644<br>[342-693]    | + 24                            | 0.01 <sup>a</sup>  |
| Rate of rehospitalization for any cause - EPPY                                             | 2.12               | 2.43                | 0.88 (0.81-0.96)                | 0.003 <sup>b</sup> |

CI, confidence interval; EPPY, events per patient year; HR, hazard ratio.

<sup>a</sup> P values for differences in duration are from Wilcoxon Rank Sum test. <sup>b</sup> HR and associated P values were calculated from the Andersen-Gill model.
